# Supplementary material for: TIM-1 defines a human regulatory B cell population that is altered in frequency and function in systemic sclerosis patients
Source: PubMed Central journal article supplement (PMC5248463; doi:10.1186/s13075-016-1213-9), 2017-01-19

# Unstimulated

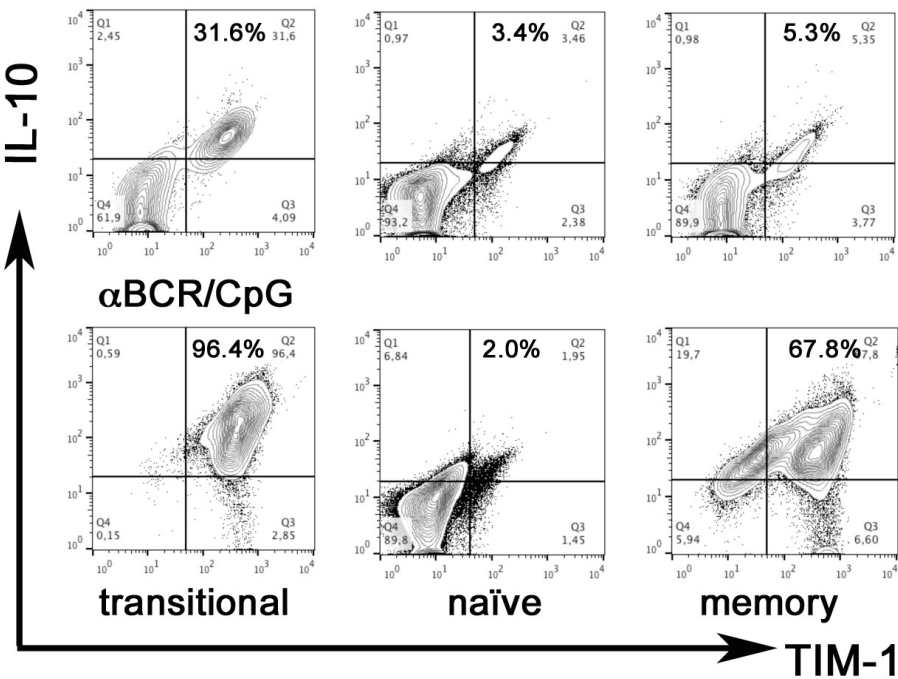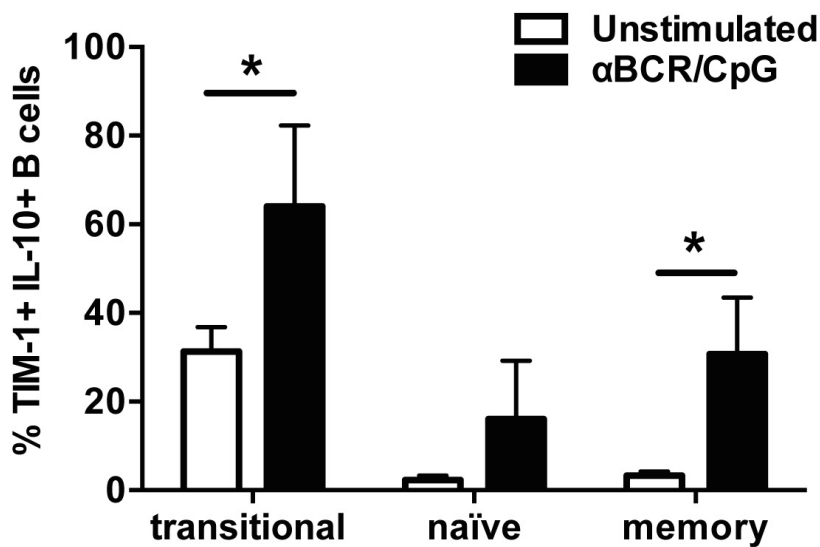

Supplement: 13075_2016_1213_MOESM1_ESM.pdf [file 13075_2016_1213_MOESM1_ESM.pdf]
